# Supplementary material
Source: Springer Nature journal article supplement (https://www.springermedizin.de/resource/supplementary/12990_2009_252_MOESM4_ESM.pdf/9612886)

**a**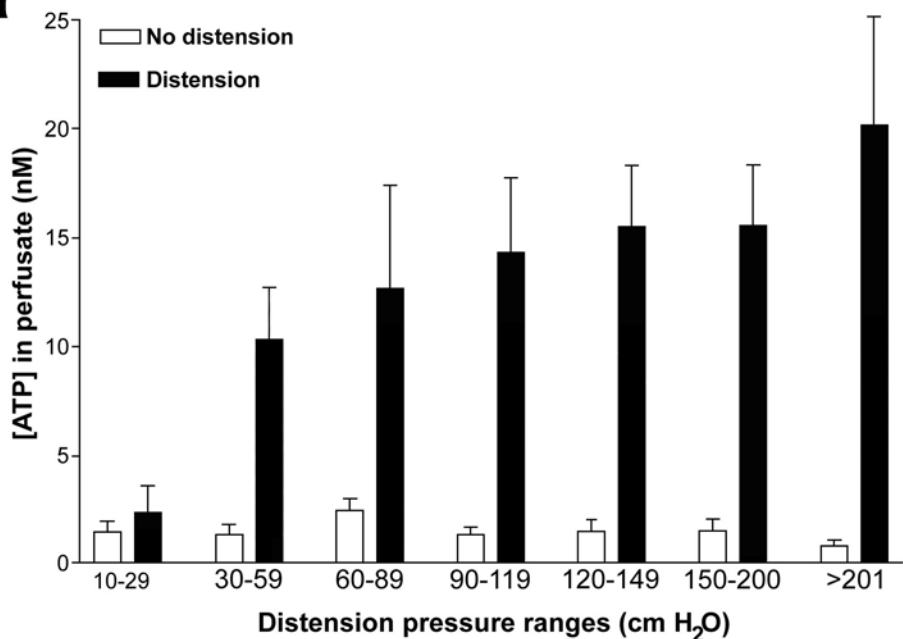**b**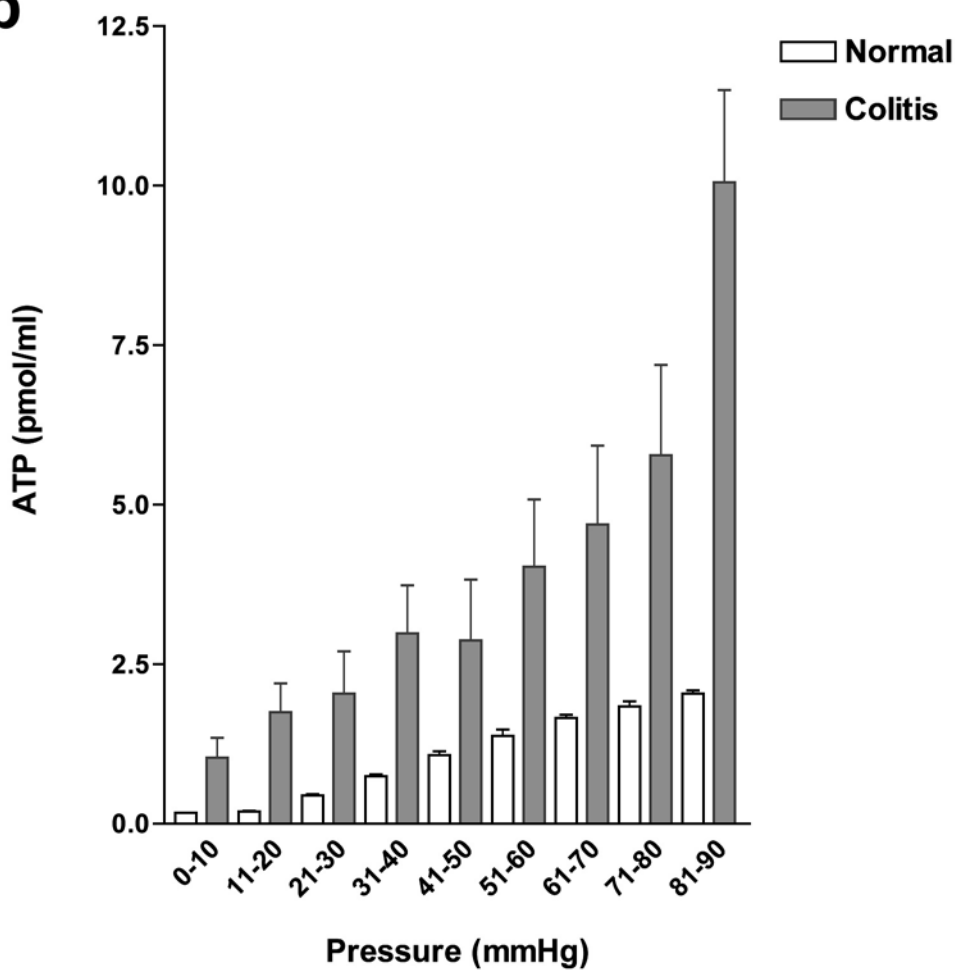

Supplement: MOESM4 [file 9612886]
